# Supplementary material for: Associations of Pan-immune-inflammation Value with Asthma and Mortality in Adults: A Cross Sectional Analysis of the NHANES 1999–2018
Source: Research Square preprint supplement (doi:10.21203/rs.3.rs-8807916/v1), 2026-02-10
Supplement: Supplementary file 1 [file c51fb913d1b01dfc82fd2c09.docx]

Table S1 Baseline characteristics of individuals with asthma in NHANES 1999–2018.

| Characteristics | Total | All-cause Mortality | | P-value |
| --- | --- | --- | --- | --- |
| No | Yes |
| N | 5212 | 4475 | 737 |  |
| Age | 47.60 ± 17.63 | 44.55 ± 16.24 | 66.15 ± 13.94 | <0.001 |
| Gender |  |  |  | 0.002 |
| Female | 2977 (57.12%) | 2595 (57.99%) | 382 (51.83%) |  |
| Male | 2235 (42.88%) | 1880 (42.01%) | 355 (48.17%) |  |
| Race |  |  |  | <0.001 |
| Mexican American | 520 (9.98%) | 467 (10.44%) | 53 (7.19%) |  |
| Other Hispanic | 442 (8.48%) | 399 (8.92%) | 43 (5.83%) |  |
| Non-Hispanic White | 2623 (50.33%) | 2175 (48.60%) | 448 (60.79%) |  |
| Non-Hispanic Black | 1208 (23.18%) | 1048 (23.42%) | 160 (21.71%) |  |
| Other race | 419 (8.04%) | 386 (8.63%) | 33 (4.48%) |  |
| BMI, kg/m2 | 30.51 ± 8.05 | 30.56 ± 8.07 | 30.24 ± 7.96 | 0.548 |
| PIR | 2.44 ± 1.64 | 2.51 ± 1.67 | 1.97 ± 1.36 | <0.001 |
| Education level |  |  |  | <0.001 |
| Below high school | 1158 (22.22%) | 879 (19.64%) | 279 (37.86%) |  |
| High school | 1144 (21.95%) | 976 (21.81%) | 168 (22.80%) |  |
| Above high school | 2910 (55.83%) | 2620 (58.55%) | 290 (39.35%) |  |
| Marital status |  |  |  | <0.001 |
| Married | 2401 (46.07%) | 2079 (46.46%) | 322 (43.69%) |  |
| Widowed | 404 (7.75%) | 230 (5.14%) | 174 (23.61%) |  |
| Divorced | 711 (13.64%) | 583 (13.03%) | 128 (17.37%) |  |
| Separated | 194 (3.72%) | 166 (3.71%) | 28 (3.80%) |  |
| Never married | 1079 (20.70%) | 1027 (22.95%) | 52 (7.06%) |  |
| Living with partner | 423 (8.12%) | 390 (8.72%) | 33 (4.48%) |  |
| Smoking |  |  |  | <0.001 |
| Current smoker | 1291 (24.77%) | 1083 (24.20%) | 208 (28.22%) |  |
| Former smoker | 1379 (26.46%) | 1078 (24.09%) | 301 (40.84%) |  |
| Never smoker | 2542 (48.77%) | 2314 (51.71%) | 228 (30.94%) |  |
| Drinking status |  |  |  | 0.230 |
| Nondrinker | 1738 (33.35%) | 1478 (33.03%) | 260 (35.28%) |  |
| Drinker | 3474 (66.65%) | 2997 (66.97%) | 477 (64.72%) |  |
| Blood pressure |  |  |  | <0.001 |
| No | 3077 (59.04%) | 2832 (63.28%) | 245 (33.24%) |  |
| Yes | 2135 (40.96%) | 1643 (36.72%) | 492 (66.76%) |  |
| Diabetes |  |  |  | <0.001 |
| Yes | 777 (14.91%) | 573 (12.80%) | 204 (27.68%) |  |
| No | 4309 (82.67%) | 3800 (84.92%) | 509 (69.06%) |  |
| Borderline | 126 (2.42%) | 102 (2.28%) | 24 (3.26%) |  |
| WBC, 103/μL | 7.10 (5.90-8.60) | 7.10 (5.90-8.60) | 7.40 (6.00-8.90) | <0.001 |
| LY, 103/μL | 2.10 (1.70-2.60) | 2.10 (1.70-2.60) | 1.90 (1.40-2.40) | <0.001 |
| MONO, 103/μL | 0.50 (0.40-0.70) | 0.50 (0.40-0.70) | 0.60 (0.50-0.70) | <0.001 |
| NE, 103/μL | 4.10 (3.20-5.30) | 4.10 (3.10-5.30) | 4.50 (3.50-5.60) | <0.001 |
| E, 103/μL | 0.20 (0.10-0.30) | 0.20 (0.10-0.30) | 0.20 (0.10-0.30) | 0.129 |
| B, 103/μL | 0.00 (0.00-0.10) | 0.00 (0.00-0.10) | 0.00 (0.00-0.10) | 0.468 |
| PLT, 103/μL | 250.00 (211.00-297.00) | 251.00 (213.00-297.00) | 245.00 (200.00-298.00) | 0.005 |
| PIV, 103/μL | 260.44 (168.52-408.02) | 253.18 (164.35-387.17) | 325.63 (203.17-536.32) | <0.001 |

BMI, body mass index; PIR, poverty income ratio; WBC, white blood cell; LY, lymphocyte; MONO, monocyte; NE, neutrophil; E, eosinophil; B, basophil; PLT, platelet; PIV, pan-immune-inflammation value. Normally distributed continuous variables are described as means ± SEs, and continuous variables without a normal distribution are presented as medians [interquartile ranges]. Categorical variables are presented as numbers (percentages).

Table S2 HRs (95% CIs) of all-cause mortality according to tertiles of pan immune inflammation value with asthma after excluding participants who died within two years of follow-up in NHANES 1999–2018 (n=4871).

| HRs (95% CIs) | T1 (<190.89) | T2 (190.89-331.43) | T3 (>331.43) | P for trend |
| --- | --- | --- | --- | --- |
| Crude | 1.00 [Reference] | 1.23(0.99, 1.53) | 1.75(1.43, 2.14) | <0.0001 |
| Model 1 | 1.00 [Reference] | 1.14(0.92, 1.42) | 1.48(1.20, 1.82) | 0.0001 |
| Model 2 | 1.00 [Reference] | 1.02(0.81, 1.27) | 1.24(1.00, 1.53) | 0.0287 |

HR, hazard ratio; CI, confidence interval. Crude adjusted for none. Model 1 adjusted for age, gender, and race. Model 2 adjusted for age, sex, race, body mass index, poverty income ratio, education level, marital status, smoking, drinking status, blood pressure, and diabetes.

Table S3 Subgroup of the association between pan immune inflammation value and all-cause mortality.

| Subgroup | T1 (<190.89) | T2 (190.89-331.43) | T3 (>331.43) | P for trend |
| --- | --- | --- | --- | --- |
| Age |  |  |  |  |
| <60 | 1.00 [Reference] | 0.99 (0.67, 1.47) | 1.48 (1.03, 2.13) | 0.0197 |
| ≥60 | 1.00 [Reference] | 1.03 (0.81, 1.31) | 1.55 (1.24, 1.94) | <0.0001 |
| Gender |  |  |  |  |
| Male | 1.00 [Reference] | 0.93 (0.69, 1.26) | 1.29 (0.97, 1.70) | 0.0344 |
| Female | 1.00 [Reference] | 1.02 (0.77, 1.36) | 1.52 (1.17, 1.97) | 0.0007 |
| Race |  |  |  |  |
| Mexican American | 1.00 [Reference] | 0.76 (0.34, 1.69) | 1.05 (0.50, 2.24) | 0.7396 |
| Other Hispanic | 1.00 [Reference] | 1.57 (0.64, 3.86) | 2.07 (0.86, 4.95) | 0.1031 |
| Non-Hispanic White | 1.00 [Reference] | 0.97 (0.73, 1.29) | 1.28 (0.995, 1.66) | 0.0178 |
| Non-Hispanic Black | 1.00 [Reference] | 0.97 (0.65, 1.44) | 1.37 (0.93, 2.01) | 0.1298 |
| Other race | 1.00 [Reference] | 0.40 (0.12, 1.33) | 2.41 (0.80, 7.25) | 0.0793 |
| Education level |  |  |  |  |
| Below high school | 1.00 [Reference] | 1.07 (0.77, 1.51) | 1.59 (1.16, 2.19) | 0.0021 |
| High school | 1.00 [Reference] | 0.99 (0.63, 1.56) | 1.38 (0.92, 2.07) | 0.0736 |
| Above high school | 1.00 [Reference] | 0.99 (0.72, 1.37) | 1.31 (0.97, 1.76) | 0.0527 |
| PIR |  |  |  |  |
| ≤1.0 | 1.00 [Reference] | 0.98 (0.67, 1.45) | 1.55 (1.09, 2.23) | 0.0067 |
| 1.0–3.0 | 1.00 [Reference] | 0.99 (0.74, 1.33) | 1.25 (0.96, 1.64) | 0.0682 |
| >3.0 | 1.00 [Reference] | 1.21 (0.77, 1.91) | 1.38 (0.91, 2.11) | 0.1290 |
| Smoking |  |  |  |  |
| Never smoker | 1.00 [Reference] | 1.09 (0.76, 1.57) | 1.59 (1.13, 2.23) | 0.0052 |
| Former smoker | 1.00 [Reference] | 0.93 (0.67, 1.31) | 1.43 (1.05, 1.93) | 0.0071 |
| Current smoker | 1.00 [Reference] | 0.93 (0.63, 1.37) | 1.12 (0.78, 1.60) | 0.4355 |
| Drinking status |  |  |  |  |
| Nondrinker | 1.00 [Reference] | 0.94 (0.66, 1.35) | 1.57 (1.13, 2.17) | 0.0024 |
| Drinker | 1.00 [Reference] | 1.04 (0.81, 1.34) | 1.33 (1.05, 1.68) | 0.0115 |
| BMI |  |  |  |  |
| <25.0 kg/m2 | 1.00 [Reference] | 0.82 (0.53, 1.26) | 1.47 (0.997, 2.18) | 0.0322 |
| 25.0-29.9 kg/m2 | 1.00 [Reference] | 0.97 (0.67, 1.40) | 1.30 (0.92, 1.84) | 0.0940 |
| >29.9 kg/m2 | 1.00 [Reference] | 1.08 (0.79, 1.47) | 1.40 (1.04, 1.87) | 0.0148 |
| Marital status |  |  |  |  |
| Married | 1.00 [Reference] | 1.05 (0.78, 1.43) | 1.13 (0.85, 1.50) | 0.3872 |
| Widowed | 1.00 [Reference] | 0.92 (0.57, 1.48) | 1.65 (1.08, 2.51) | 0.0050 |
| Divorced | 1.00 [Reference] | 0.86 (0.51, 1.46) | 1.68 (1.04, 2.72) | 0.0122 |
| Separated | 1.00 [Reference] | 1.81 (0.48, 6.89) | 5.63 (1.62, 19.54) | 0.0049 |
| Never married | 1.00 [Reference] | 1.06 (0.48, 2.35) | 1.13 (0.53, 2.38) | 0.7530 |
| Living with partner | 1.00 [Reference] | 0.996 (0.36, 2.74) | 1.10 (0.42, 2.88) | 0.8375 |
| Blood pressure |  |  |  |  |
| No | 1.00 [Reference] | 1.15 (0.89, 1.48) | 1.51 (1.19, 1.91) | 0.0003 |
| Yes | 1.00 [Reference] | 0.71 (0.50, 1.01) | 1.14 (0.82, 1.59) | 0.2333 |
| Diabetes |  |  |  |  |
| Yes | 1.00 [Reference] | 0.83 (0.54, 1.26) | 1.60 (1.13, 2.26) | 0.0018 |
| No | 1.00 [Reference] | 1.07 (0.84, 1.37) | 1.32 (1.04, 1.67) | 0.0139 |
| Borderline | 1.00 [Reference] | 0.41 (0.12, 1.44) | 0.71 (0.16, 3.13) | 0.6221 |

BMI, Body mass index; PIR, poverty income ratio;
